# Supplementary material for: Analysis of core promoter and transcription factors screening of porcine DHRS3 gene
Source: Research Square preprint supplement (doi:10.21203/rs.3.rs-5175349/v1), 2025-04-04
Supplement: Supplementary file 1 [file ead631e7e9c1ea4c263a7a2d.xlsx]

## Sheet: promoter
	pGL4.10-Basic	P1	P2	P3	P4	P5
Firefly	24579	61143	74665	163722	385688	380689
	23915	44409	72099	187582	278155	330154
	21838	54530	77417	182283	298968	311461
Renilla	127912	79441	50369	41235	86098	73624
	129066	62131	52922	46300	61657	73347
	102339	83305	56833	43179	62475	75025
Relative luciferase activity	0.192156	0.769666	1.48236	3.97046	4.47964	5.17072
	0.185293	0.714764	1.36236	4.05145	4.51133	4.50126
	0.213389	0.654583	1.36218	4.22157	4.7854	4.15143

## Sheet: transcription
	pGL4.10-Basic	pDHRS3-WT	pDHRS3-CDX1	pDHRS3-MYOD	pDHRS3-MYOG	pDHRS3-USF2
Firefly	14892	120189	57657	70520	102928	103135
	14216	128061	56636	71934	105650	109729
	13248	125849	55400	69400	85574	115261
Renilla	63604	28555	24097	9279	17392	12889
	57632	29965	23960	9467	17862	13339
	60380	32938	25302	8950	13995	13617
Relative luciferase activity	0.234136	4.20904	2.3927	7.59996	5.91812	8.00178
	0.246669	4.27369	2.36377	7.59839	5.91479	8.22618
	0.21941	3.82078	2.18955	7.75419	6.11461	8.46449
